# Supplementary material for: Real-time location of acupuncture points based on anatomical landmarks and pose estimation models
Source: Frontiers journal article supplement (doi:10.3389/fnbot.2024.1484038), 2024-11-08
Supplement: Data_Sheet_1.zip [file Data_Sheet_1.zip]

| HELP               |                                                 |
|--------------------|-------------------------------------------------|
| $x, y$             | two <i>distance</i>                             |
| $A, C, \text{mid}$ | $A, C, \text{mid}$ , and $C$ , the <i>mid</i> . |
| $C, \text{sum}$    | $C, \text{sum}$ $1/3 * A * B$ .                 |
| $1, A$             | <i>Total distance</i>                           |
| $n, 7$             | <i>coordinates of airport new</i>               |
| $(x1, y1)$         | <i>coordinates of location 1 from map</i>       |
| $(x2, y2)$         | <i>coordinates of location 2 from map</i>       |
| $(x3, y3)$         | <i>coordinates of location 3 from map</i>       |
| $(x4, y4)$         | <i>coordinates of location 4 from map</i>       |
| $(x5, y5)$         | <i>coordinates of location 5 from map</i>       |
| $(x6, y6)$         | <i>coordinates of location 6 from map</i>       |
| $(x7, y7)$         | <i>coordinates of location 7 from map</i>       |
| $(x8, y8)$         | <i>coordinates of location 8 from map</i>       |
| $(x9, y9)$         | <i>coordinates of location 9 from map</i>       |
| $(x10, y10)$       | <i>coordinates of location 10 from map</i>      |
| $(x11, y11)$       | <i>coordinates of location 11 from map</i>      |
| $(x12, y12)$       | <i>coordinates of location 12 from map</i>      |
| $(x13, y13)$       | <i>coordinates of location 13 from map</i>      |
| $(x14, y14)$       | <i>coordinates of location 14 from map</i>      |
| $(x15, y15)$       | <i>coordinates of location 15 from map</i>      |
| $(x16, y16)$       | <i>coordinates of location 16 from map</i>      |
| $(x17, y17)$       | <i>coordinates of location 17 from map</i>      |
| $(x18, y18)$       | <i>coordinates of location 18 from map</i>      |
| $(x19, y19)$       | <i>coordinates of location 19 from map</i>      |
| $(x20, y20)$       | <i>coordinates of location 20 from map</i>      |
| $(x21, y21)$       | <i>coordinates of location 21 from map</i>      |
| $(x22, y22)$       | <i>coordinates of location 22 from map</i>      |
| $(x23, y23)$       | <i>coordinates of location 23 from map</i>      |
| $(x24, y24)$       | <i>coordinates of location 24 from map</i>      |
| $(x25, y25)$       | <i>coordinates of location 25 from map</i>      |
| $(x26, y26)$       | <i>coordinates of location 26 from map</i>      |
| $(x27, y27)$       | <i>coordinates of location 27 from map</i>      |
| $(x28, y28)$       | <i>coordinates of location 28 from map</i>      |
| $(x29, y29)$       | <i>coordinates of location 29 from map</i>      |
| $(x30, y30)$       | <i>coordinates of location 30 from map</i>      |
| $(x31, y31)$       | <i>coordinates of location 31 from map</i>      |
| $(x32, y32)$       | <i>coordinates of location 32 from map</i>      |
| $(x33, y33)$       | <i>coordinates of location 33 from map</i>      |
| $(x34, y34)$       | <i>coordinates of location 34 from map</i>      |
| $(x35, y35)$       | <i>coordinates of location 35 from map</i>      |
| $(x36, y36)$       | <i>coordinates of location 36 from map</i>      |
| $(x37, y37)$       | <i>coordinates of location 37 from map</i>      |
| $(x38, y38)$       | <i>coordinates of location 38 from map</i>      |
| $(x39, y39)$       | <i>coordinates of location 39 from map</i>      |
| $(x40, y40)$       | <i>coordinates of location 40 from map</i>      |
| $(x41, y41)$       | <i>coordinates of location 41 from map</i>      |
| $(x42, y42)$       | <i>coordinates of location 42 from map</i>      |
| $(x43, y43)$       | <i>coordinates of location 43 from map</i>      |
| $(x44, y44)$       | <i>coordinates of location 44 from map</i>      |
| $(x45, y45)$       | <i>coordinates of location 45 from map</i>      |
| $(x46, y46)$       | <i>coordinates of location 46 from map</i>      |
| $(x47, y47)$       | <i>coordinates of location 47 from map</i>      |
| $(x48, y48)$       | <i>coordinates of location 48 from map</i>      |
| $(x49, y49)$       | <i>coordinates of location 49 from map</i>      |
| $(x50, y50)$       | <i>coordinates of location 50 from map</i>      |
| $(x51, y51)$       | <i>coordinates of location 51 from map</i>      |
| $(x52, y52)$       | <i>coordinates of location 52 from map</i>      |
| $(x53, y53)$       | <i>coordinates of location 53 from map</i>      |
| $(x54, y54)$       | <i>coordinates of location 54 from map</i>      |
| $(x55, y55)$       | <i>coordinates of location 55 from map</i>      |
| $(x56, y56)$       | <i>coordinates of location 56 from map</i>      |
| $(x57, y57)$       | <i>coordinates of location 57 from map</i>      |
| $(x58, y58)$       | <i>coordinates of location 58 from map</i>      |
| $(x59, y59)$       | <i>coordinates of location 59 from map</i>      |
| $(x60, y60)$       | <i>coordinates of location 60 from map</i>      |
| $(x61, y61)$       | <i>coordinates of location 61 from map</i>      |
| $(x62, y62)$       | <i>coordinates of location 62 from map</i>      |
| $(x63, y63)$       | <i>coordinates of location 63 from map</i>      |
| $(x64, y64)$       | <i>coordinates of location 64 from map</i>      |
| $(x65, y65)$       | <i>coordinates of location 65 from map</i>      |
| $(x66, y66)$       | <i>coordinates of location 66 from map</i>      |
| $(x67, y67)$       | <i>coordinates of location 67 from map</i>      |
| $(x68, y68)$       | <i>coordinates of location 68 from map</i>      |
| $(x69, y69)$       | <i>coordinates of location 69 from map</i>      |
| $(x70, y70)$       | <i>coordinates of location 70 from map</i>      |
| $(x71, y71)$       | <i>coordinates of location 71 from map</i>      |
| $(x72, y72)$       | <i>coordinates of location 72 from map</i>      |
| $(x73, y73)$       | <i>coordinates of location 73 from map</i>      |
| $(x74, y74)$       | <i>coordinates of location 74 from map</i>      |
| $(x75, y75)$       | <i>coordinates of location 75 from map</i>      |
| $(x76, y76)$       | <i>coordinates of location 76 from map</i>      |
| $(x77, y77)$       | <i>coordinates of location 77 from map</i>      |
| $(x78, y78)$       | <i>coordinates of location 78 from map</i>      |
| $(x79, y79)$       | <i>coordinates of location 79 from map</i>      |
| $(x80, y80)$       | <i>coordinates of location 80 from map</i>      |
| $(x81, y81)$       | <i>coordinates of location 81 from map</i>      |
| $(x82, y82)$       | <i>coordinates of location 82 from map</i>      |
| $(x83, y83)$       | <i>coordinates of location 83 from map</i>      |
| $(x84, y84)$       | <i>coordinates of location 84 from map</i>      |
| $(x85, y85)$       | <i>coordinates of location 85 from map</i>      |
| $(x86, y86)$       | <i>coordinates of location 86 from map</i>      |
| $(x87, y87)$       | <i>coordinates of location 87 from map</i>      |
| $(x88, y88)$       | <i>coordinates of location 88 from map</i>      |
| $(x89, y89)$       | <i>coordinates of location 89 from map</i>      |
| $(x90, y90)$       | <i>coordinates of location 90 from map</i>      |
| $(x91, y91)$       | <i>coordinates of location 91 from map</i>      |
| $(x92, y92)$       | <i>coordinates of location 92 from map</i>      |
| $(x93, y93)$       |                                                 |

| Acupoint | Pink Name  | Morbidities       | Lateralities                                                                                                                                                                                                         | Face                                                                                                                                                                                                                                                                                                                                                                           | Channel Impact                                                       | right hand / right side of face | left hand / left side of face                                         |
|----------|------------|-------------------|----------------------------------------------------------------------------------------------------------------------------------------------------------------------------------------------------------------------|--------------------------------------------------------------------------------------------------------------------------------------------------------------------------------------------------------------------------------------------------------------------------------------------------------------------------------------------------------------------------------|----------------------------------------------------------------------|---------------------------------|-----------------------------------------------------------------------|
| CV-24    | Chengjiang | Conception Vessel | On the face, in the depression in the center of the mental sulcus.                                                                                                                                                   | Facial pain/paralysis - Bell's palsy; stroke affecting the face, mouth and/or tongue.<br>Dental pain: tooth and/or gum<br>Speech issues - loss of voice, hoarseness, difficulty swallowing<br>Dry mouth as seen in xerostomia and Sjögren's syndrome (i.e., diabetes)                                                                                                          | p0(200)                                                              |                                 |                                                                       |
| BL-1     | Jingming   | Blaclider         | On the face, in the depression between two transverse palmar pores of the inner canthus of the eye and the medial wall of the orbit.                                                                                 | Eye pain, strain, redness, swelling, itching, twitching, blurry vision, etc.<br>Myopia, color blindness, night blindness<br>Glaucoma, optic nerve atrophy, cataracts                                                                                                                                                                                                           | p_BLI+~p0(613)                                                       |                                 | p_BLI+~p0(890)                                                        |
| BL-2     | Cunmu      | Blaclider         | On the head, in the depression at the midline of the eyebrow.                                                                                                                                                        | Local point for stress competition or headache.<br>Red, itchy watery eyes - allergies                                                                                                                                                                                                                                                                                          | p_BLI+~p0(285)                                                       |                                 | p_BLI+~p0(855)                                                        |
| GB-1     | Tongzilao  | Gallbladder       | On the head, in the depression 0.5 li caudal to the outer canthus of the eye.                                                                                                                                        | Rising affecting the head - headache, eye problems, similar to Tanyang which is used more.<br>Local point for manifestations of heat - pain, inflammation, etc                                                                                                                                                                                                                 | p_GBI+~p0(046), s_p0(339), y)                                        |                                 | p_GBI+~p0(528), s_p0(180), y)                                         |
| GB-2     | Tinghai    | Gallbladder       | On the face, in the depression between zygomatic notch and the corollary process of the mandible                                                                                                                     | Ear noises, tinnitus, otitis media, deafness.<br>Glossitis: oral fissure - TMJ disorder, facial paralysis, trigeminal neuralgia, toothache                                                                                                                                                                                                                                     | p_GBI+~p0(523)                                                       |                                 | p_GBI+~p0(490)                                                        |
| GB-14    | Yanbai     | Gallbladder       | On the head, 1 fu caudal superior to the eyebrow, directly superior to the center of the pupil.                                                                                                                      | Frontal/biparietal (SUTM) areas headaches<br>Eye issues (direct needle towards eye) - redness, swelling, itching, twitching, etc                                                                                                                                                                                                                                               | p_GBI+~p0(299)                                                       |                                 | p_GBI+~p0(490)                                                        |
| GV-25    | Shuan      | Governing Vessel  | On the face, at the tip of the nose                                                                                                                                                                                  | Important point to restore or help maintain consciousness, for shock, loss of consciousness, to revive from sleeping.<br>Resonance, circulation issues in nose<br>Nasal issues - rhinitis, polyps, discharge, instability or changes in olfactory sensation (smell).<br>May reduce olfactory insensitivity (anosmia)                                                           | p_GV25+~p0(4)                                                        |                                 |                                                                       |
| GV-26    | Shiguo     | Governing Vessel  | On the face, at the midpoint of the philtrum/midline.                                                                                                                                                                | Main point for acute low back sprain, helps relieve pain and restores motion, nerves regeneration at the sensory end of the channel. After stimulating the Qi, here patient bends then relaxes the waist.<br>Neuroblast, nasal discharge issues, problems with olfactory sensations (smell)<br>Meningeal depression and other strong stress disturbances, epilepsy (seizures). | p_GV26+~p0(14), p_119+4(6)                                           |                                 |                                                                       |
| GV-27    | Dishui     | Governing Vessel  | On the face, at the midpoint of the tubercle of the upper lip                                                                                                                                                        | Problems of the mouth and sinuses - tongue ulcers, bad breath (halitosis), pain or swelling of the gums, nasalized, nasal congestion.<br>Psychological Stress issues - chronic depression, epilepsy, etc.                                                                                                                                                                      | p_GV27+~p0(8)                                                        |                                 |                                                                       |
| LI-19    | Koulianao  | Large Intestine   | On the face, at the same level as the midpoint of the philtrum, inferior to the intermargin of the nostril.                                                                                                          | Sinus congestion<br>Nasal polyps, sinus<br>Neuroblast                                                                                                                                                                                                                                                                                                                          | s_d = hq(330) ~ p0(567)<br>p_LI19+~p0(079) - p0(187)+*(63%_d)        |                                 | s_d = hq(330) ~ p0(567)<br>p_LI19+~p0(093)~p0(187) - p0(390)+*(63%_d) |
| LI-20    | Yingxiang  | Large Intestine   | On the face, in the mental sulcus, at the same level as the midpoint of lateral border of the ala of the nose.                                                                                                       | Loss of smell or taste, nasal discharge, any nose a/c sinus issues, nasal polyps, rhinitis, sinusitis, allergies.<br>Tong Root-Ten Holding System Sinus issues                                                                                                                                                                                                                 | p_LI20+~p0(198)                                                      |                                 | p_LI20+~p0(120)                                                       |
| SI-18    | Quanliao   | Small Intestine   | On the face, inferior to the zygomatic bone, in the depression directly inferior to the outer canthus of the eye.                                                                                                    | Local point for facial disorders, Bell's palsy, trigeminal neuralgia, spasms, twitching of the eyelids, facial muscle, etc.<br>Upper jaw weakness<br>Lifting of the sclera                                                                                                                                                                                                     | s_d = hq(481) ~ p0(625)<br>p_SI18+~p0(11)~p0(423) ~ p0(411)+*(13%_d) |                                 | s_d = hq(480) ~ p0(617)<br>p_SI18+~p0(137)~p0(426) - p0(187)+*(13%_d) |
| ST-1     | Chengji    | Stomach           | On the face, between the eyelid and infraorbital margin, directly inferior to the pupil.                                                                                                                             | Any eye issue, although ST-2 is a good alternative and arguably safer to needle.<br>Excessive lacrimation, redness, dryness, painful a/c watery eye/eyelid, twitching of the eyelids<br>Visual disturbances, night blindness                                                                                                                                                   | p_ST1+~p0(480)                                                       |                                 | p_ST1+~p0(230)                                                        |
| ST-2     | Shui       | Stomach           | On the face, in the infraorbital furrow below eye, internal to ST-1                                                                                                                                                  | Any eye problem - red, painful and/or itchy eyes, excessive lacrimation, twitching of the eyelids.<br>Facial paralysis<br>Good alternative to ST-1 and safer to needle for those not properly trained.                                                                                                                                                                         | p_ST2+~p0(130)                                                       |                                 | p_ST2+~p0(180)                                                        |
| ST-3     | Jiale      | Stomach           | On the face, directly inferior to the pupil, at the same level as the inferior border of the ala of the nose. Below eye, internal to ST-2                                                                            | Local point - Twitching eyelids, pain or swelling of the cheek, trigeminal neuralgia, toothache.<br>Deviation from midline, bell's palsy, facial paralysis.<br>Swelling of the face (fluid retention)                                                                                                                                                                          | p_ST3+~p0(426)                                                       |                                 | p_ST3+~p0(290)                                                        |
| ST-4     | Dicang     | Stomach           | On the face, in the depression between two transverse palmar pores of the inner canthus of the eye and the medial wall of the orbit.                                                                                 | Facial pain - Bell's palsy, facial paralysis, trigeminal neuralgia, deviation of mouth from midline, toothache<br>Inability to close the eye, eye twitching, itching, night blindness<br>Inability to eat<br>May be helpful for atrophy and/or movement issues within the lips                                                                                                 | p_ST4+~p0(287)                                                       |                                 | p_ST4+~p0(157)                                                        |
| ST-5     | Daying     | Stomach           | On the face, anterior to the angle of the mandible, in the depression anterior to the masseter attachment, over the facial artery.                                                                                   | Local point - Pain or swelling of the cheek/jaw, neck pain, lockjaw, toothache<br>Tugger leading to speech problems, frequent yawning                                                                                                                                                                                                                                          | s_d = hq(360) ~ p0(567)<br>p_ST5+~p0(360)~p0(360) - p0(367)+*(12%_d) |                                 | s_d = hq(330) ~ p0(130)<br>p_ST5+~p0(360)~p0(360) - p0(137)+*(12%_d)  |
| ST-6     | Jiahe      | Stomach           | On the face, one finger breadth (middle finger) anteroposterior to the angle of the mandible                                                                                                                         | Elemental wind from the face - TMJ, toothache, Bell's palsy, twitching, facial pain/paralysis<br>Loss of voice, deviation of mouth/lips, lockjaw                                                                                                                                                                                                                               | p_ST6+~p0(280)                                                       |                                 | p_ST6+~p0(190)                                                        |
| ST-7     | Xiguan     | Stomach           | On the face, in the depression between two fingertips of the inferior border of the zygomatic arch and the mandibular notch                                                                                          | TMJ, facial pain, lower jaw toothache<br>Hearing issues, dizziness, tinnitus, ear pain, ear discharge/infections                                                                                                                                                                                                                                                               | s_d = hq(360) ~ p0(568)<br>p_ST7+~p0(360)~p0(360) - p0(366)+*(13%_d) |                                 | s_d = hq(337) ~ p0(258)<br>p_ST7+~p0(373)~p0(426) - p0(137)+*(13%_d)  |
| TE-23    | Shichang   | Temple Energetics | On the head, in the depression at the lateral end of the eyebrow.                                                                                                                                                    | Eye pain, redness, swelling, twitching, drooping eyelid<br>Liver Wind or Liver Fire headache, combine with local points                                                                                                                                                                                                                                                        | p_TE23+~p0(800)                                                      |                                 | p_TE23+~p0(670)                                                       |
| Hand     |            |                   |                                                                                                                                                                                                                      |                                                                                                                                                                                                                                                                                                                                                                                |                                                                      |                                 |                                                                       |
| HU-7     | Shimen     | Heart             | On the anteromedial aspect of the wrist radial to the flexor carpi ulnaris tendon, under palmar wrist crease. Note: In the depression radial to the proximal border of the pisiform bone, on irregular wrist crease. | Timely deficiencies of the HT Qi, Blood, Yin and Yang<br>Emotional issues especially those with related sleep or thinking manifestations - insomnia, modified thinking<br>Risks and Disagreements leading to insomnia, anxiety, mania                                                                                                                                          | HU7-dzjg(0), p0(1), p0(0), 137mm_distance                            |                                 | HU7-dzjg(0), p0(1), p0(0), 137mm_distance                             |

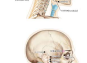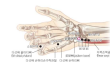

|       |            |                  |                                                                                                                                                                                                                                                                     |                                                                                                                                                                                                                                                                                                                        |                                                                                                                                                       |                                                                                                                                                       |                                                                                       |
|-------|------------|------------------|---------------------------------------------------------------------------------------------------------------------------------------------------------------------------------------------------------------------------------------------------------------------|------------------------------------------------------------------------------------------------------------------------------------------------------------------------------------------------------------------------------------------------------------------------------------------------------------------------|-------------------------------------------------------------------------------------------------------------------------------------------------------|-------------------------------------------------------------------------------------------------------------------------------------------------------|---------------------------------------------------------------------------------------|
| HT-8  | Shaohu     | Heart            | On the palm of the hand, in the depression between the fourth and fifth metacarpophalangeal joints                                                                                                                                                                  | Channel issues, severe throat, tongue stiffness, pain along the outer aspect of the arm<br>Heart Qi deficiency - palpitations, faint, hot palms<br>Local point for arm pain, elbow pain, and/or pain in the pinky finger.                                                                                              | $1, d = \text{lg}(mid_{1413}, el17) - \text{pc}(08)$<br>$p_{1413} = \text{pmid}_{1413}, el17) - \text{qp}(08) - \text{pc}(mid_{1413}, el17) * 1.59\%$ | $1, d = \text{lg}(mid_{1413}, el17) - \text{pc}(08)$<br>$p_{1413} = \text{pmid}_{1413}, el17) - \text{qp}(08) - \text{pc}(mid_{1413}, el17) * 1.59\%$ | 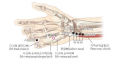   |
| HT-9  | Shaochong  | Heart            | On the little finger, radial to the distalphalanx, 0.1 cun proximal lateral to thoracic corner of the little finger nail, at the intersection of the vertical line of the midlateral of the nail and horizontal line of the base of the little finger nail.         | Restless consciousness - heart attack, stroke<br>Emergency heart attack point - strong stimulation<br>Pain below the heart - angina, pain or distention in the HT area.                                                                                                                                                | $p_{1419} = \text{diag}(p19), \text{pc}(20), \text{pc}(23), \text{p}(19, \text{A}(20)), -1.5^{\circ} \text{ cun}$                                     | $p_{1419} = \text{diag}(p19), \text{pc}(20), \text{pc}(23), \text{p}(19, \text{A}(20)), 1.5^{\circ} \text{ cun}$                                      |    |
| LA-1  | Shangyang  | Large Intestine  | On the index finger, radial to the distalphalanx, 0.1 cun proximal lateral to thoracic corner of the index finger nail, at the intersection of the vertical line of the midlateral of the finger nail and the horizontal line of the base of the index finger nail. | pain, stagnation, especially at the opposite end of the channel, for eye and ear pain and inflammation, toothache.<br>Blood for high fever, coma                                                                                                                                                                       | $p_{141} = \text{diag}(p17), \text{pc}(08), \text{pc}(23), \text{p}(17, \text{A}(8)), -1.4^{\circ} \text{ cun}$                                       | $p_{141} = \text{diag}(p17), \text{pc}(08), \text{pc}(23), \text{p}(17, \text{A}(8)), 1.4^{\circ} \text{ cun}$                                        |    |
| LA-2  | Fujian     | Large Intestine  | On the index finger, in the depression distal the radial side of the second metacarpophalangeal joint, at the border between red and white flesh.                                                                                                                   | Shoves to increase saliva production and to affect the nerve of the brain involved in saliva production. Useful for dry mouth (xerostomia).<br>Isolation from and Yang Spring Point. Warm strokes and clear heat from opposite end of the channel, for toothache, eye redness and pain, gum inflammation, sore throat. | $p_{142} = \text{pc}(18), \text{p}(18, \text{A}(8))$                                                                                                  | $p_{142} = \text{pc}(18), \text{p}(18, \text{A}(8))$                                                                                                  |    |
| LA-3  | Sanjian    | Large Intestine  | On the dorsum of the hand, in the depression radial and proximal to the second metacarpophalangeal joint.                                                                                                                                                           | Excess wind and heat particularly from the throat, teeth, mouth, face and eyes.<br>Dermatitis.                                                                                                                                                                                                                         | $p_{143} = \text{pc}(19), \text{p}(19, \text{A}(8))$                                                                                                  | $p_{143} = \text{pc}(19), \text{p}(19, \text{A}(8))$                                                                                                  |    |
| LA-4  | Hegu       | Large Intestine  | On the dorsum of the hand, radial to the first joint of the second metacarpal bone                                                                                                                                                                                  | Relieves the exterior for wind-cold or wind-heat syndromes<br>Strengthens the wrist (p. improves sensory)<br>Headache, especially frontal and/or sinus (sinus areas).<br>Chenue Point                                                                                                                                  | $p_{144} = \text{pc}(13), \text{p}(13, \text{p}(14, \text{A}(2)), \text{A}(5))$                                                                       | $p_{144} = \text{pc}(13), \text{p}(13, \text{p}(14, \text{A}(2)), \text{A}(5))$                                                                       |    |
| LI-11 | Shaochong  | Lung             | On the thumb, radial to the distal phalanx, 0.1 cun proximal lateral to the radial corner of the thumb nail, at the intersection of the vertical line of the radial border and the horizontal line of the base of the thumb nail.                                   | Extreme sore throat (any blood point to relieve heat).<br>Reversal point especially from wind-cold.                                                                                                                                                                                                                    | $1, d = \text{lg}(p17) - \text{pc}(08)$<br>$p_{1413} = \text{diag}(p17), \text{pc}(08), \text{pc}(23), \text{p}(17, \text{A}(8)), 1.59\%$             | $1, d = \text{lg}(p17) - \text{pc}(08)$<br>$p_{1413} = \text{diag}(p17), \text{pc}(08), \text{pc}(23), \text{p}(17, \text{A}(8)), 1.59\%$             |    |
| LI-9  | Taiyuan    | Lung             | On the interdigital aspect of the wrist between the radial styloid process and the scaphoid bone, in the depression distal to the tubercle of the scaphoid bone.                                                                                                    | Palpitations.<br>Wrist pain, arm pain along meridian.<br>This Meeting Point of the Vessels - circulation issues, clarifying an indecipherable pulse (for diagnosis).<br>Main treatment point of Lung (the pattern (yin SP 5))                                                                                          | $p_{149} = \text{diag}(p19), \text{pc}(13), \text{p}(14, \text{A}(8)), 1.59\%$                                                                        | $p_{149} = \text{diag}(p19), \text{pc}(13), \text{p}(14, \text{A}(8)), 1.59\%$                                                                        |    |
| PC-9  | Zhongchong | Pericardium      | On the middle finger, at the center of the tip of the middle finger.                                                                                                                                                                                                | Yang Wei Point for clearing heat in the Heart.<br>Bell tongue, speech disorders, especially those arising after a stroke.<br>Restoring consciousness.                                                                                                                                                                  | $1, d = \text{lg}(p11) - \text{pc}(12)$<br>$p_{149} = \text{diag}(p11), \text{pc}(12), \text{p}(11), \text{p}(14, \text{A}(8))$                       | $1, d = \text{lg}(p11) - \text{pc}(12)$<br>$p_{149} = \text{diag}(p11), \text{pc}(12), \text{p}(11), \text{p}(14, \text{A}(8))$                       |    |
| SI-4  | Shaoze     | Small Intestine  | On the little finger, distal to the distalphalanx, 0.1 cun proximal medial to the radial corner of the little finger nail, at the intersection of the vertical line of the radial border and the horizontal line of the base of the little finger nail.             | Breast disorders of any etiology, insufficient lactation, mastitis, breast abscess.<br>Local point for problems of the little finger and the course of the channel - pain and/or weakness of the arm and/or shoulder.                                                                                                  | $p_{151} = \text{diag}(p19), \text{pc}(20), \text{pc}(23), \text{p}(19, \text{A}(20)), 1.5^{\circ} \text{ cun}$                                       | $p_{151} = \text{diag}(p19), \text{pc}(20), \text{pc}(23), \text{p}(19, \text{A}(20)), 1.5^{\circ} \text{ cun}$                                       |    |
| SI-2  | Qianshi    | Small Intestine  | On the little finger, in the depression distal the ulnar side of the fifth metacarpophalangeal joint, at the border between the red and white flesh.                                                                                                                | Local point for pain, swelling, numbness of the fingers. As the water point it will relieve heat - effectively decrease, but pain, darker urine.<br>Clear heat from the opposite end of the channel, toothache, sore throat, neck, ear and/or eye pain and/or swelling.                                                | $p_{152} = \text{pc}(13), \text{p}(17, \text{A}(8))$                                                                                                  | $p_{152} = \text{pc}(13), \text{p}(17, \text{A}(8))$                                                                                                  |    |
| SI-3  | Houxi      | Small Intestine  | On the dorsum of the hand, in the depression proximal to the ulnar side of the fifth metacarpophalangeal joint, at the border between the red and white flesh.                                                                                                      | Clears heat and excess from the head, eyes and eyes, eye redness, inflammation, visual disturbance, sinusitis, toothache, sore throat.<br>Calms the spirit, anxiety, some depression.                                                                                                                                  | $p_{153} = \text{pc}(17), \text{p}(17, \text{A}(8))$                                                                                                  | $p_{153} = \text{pc}(17), \text{p}(17, \text{A}(8))$                                                                                                  |   |
| SI-4  | Wanggu     | Small Intestine  | On the posteroventral aspect of the wrist, radial depression between the base of the fifth metacarpal bone and the trapezoid bone, at the border between the red and white flesh.                                                                                   | Local point for shoulder, arm, hand and wrist problems particularly along the course of the meridian.<br>Useful point to treat problems with all fingers - contracture, pain, swelling, stiffness.<br>Headache, neck pain, jawache.                                                                                    | $p_{154} = \text{pc}(13), \text{p}(17, \text{A}(8))$                                                                                                  | $p_{154} = \text{pc}(13), \text{p}(17, \text{A}(8))$                                                                                                  |  |
| TE-1  | Chuanzhong | Triple Energizer | On the ring finger, distal to the distalphalanx, 0.1 cun proximal to the ulnar corner of the finger nail, at the intersection of the vertical line of the ulnar border and the horizontal line of the base of the finger nail.                                      | Ear Problems of any etiology such as excess stimulation<br>Distal point for temporal headache, shoulder and/or upper back pain, pain or inflammation in the throat.                                                                                                                                                    | $p_{171} = \text{diag}(p19), \text{pc}(15), \text{pc}(23), \text{p}(19, \text{A}(15)), -1.4^{\circ} \text{ cun}$                                      | $p_{171} = \text{diag}(p19), \text{pc}(15), \text{pc}(23), \text{p}(19, \text{A}(15)), -1.4^{\circ} \text{ cun}$                                      |  |
| TE-2  | Yimen      | Triple Energizer | On the dorsum of the hand, in the depression superior to the web margin between the ring and little fingers, at the border between the red and white flesh.                                                                                                         | Ear Problems of any etiology such as excess stimulation<br>Distal point for temporal headache, shoulder and/or upper back pain, pain or inflammation in the throat.                                                                                                                                                    | $p_{172} = \text{diag}(p19), \text{pc}(13), \text{p}(13, \text{p}(14, \text{A}(8))), \text{p}(13), \text{p}(17, \text{A}(8))$                         | $p_{172} = \text{diag}(p19), \text{pc}(13), \text{p}(13, \text{p}(14, \text{A}(8))), \text{p}(13), \text{p}(17, \text{A}(8))$                         |  |
| TE-3  | Zhongfeng  | Triple Energizer | On the dorsum of the hand, between the fourth and fifth metacarpal bones, in the depression proximal to the fourth metacarpophalangeal joint.                                                                                                                       | Ear Problems of any etiology such as excess stimulation<br>Distal point for temporal headache, shoulder and/or upper back pain, pain or inflammation in the throat.                                                                                                                                                    | $1, d = \text{lg}(mid_{1413}, el17) - \text{pc}(08)$<br>$p_{1413} = \text{pmid}_{1413}, el17) - \text{qp}(08) - \text{pc}(mid_{1413}, el17) * 1.59\%$ | $1, d = \text{lg}(mid_{1413}, el17) - \text{pc}(08)$<br>$p_{1413} = \text{pmid}_{1413}, el17) - \text{qp}(08) - \text{pc}(mid_{1413}, el17) * 1.59\%$ |  |
| TE-4  | Yangbi     | Triple Energizer | On the posterior aspect of the wrist, in the depression distal to the extensor digitorum tendon, on the dorsal wrist crease.                                                                                                                                        | Dorsal wrist issues such as strains, sprains or subluxations.<br>Warming & dissolving clots, expels water metabolism, alleviates dry mouth and thirst.<br>Means to tonify the Yang of the body                                                                                                                         | $p_{174} = \text{pc}(14), \text{p}(14, \text{A}(8))$                                                                                                  | $p_{174} = \text{pc}(14), \text{p}(14, \text{A}(8))$                                                                                                  |  |

Reference: Who standard Acupuncture point locations in the western pacific region

Reference: Who standard Acupuncture point locations in the western pacific region

Reference: the Yixiang Huanu Website

<http://www.yixianghuanu.com/>
