# Supplementary material for: Real-time location of acupuncture points based on anatomical landmarks and pose estimation models
Source: Frontiers journal article supplement (doi:10.3389/fnbot.2024.1484038), 2024-11-08
Supplement: Data_Sheet_1.zip [file Data_Sheet_1.zip]

Table S2

[illegible]

|     |         |         |         |         |        |         |         |         |         |         |         |         |         |        |        |         |         |        |           |           |           |
|-----|---------|---------|---------|---------|--------|---------|---------|---------|---------|---------|---------|---------|---------|--------|--------|---------|---------|--------|-----------|-----------|-----------|
| 170 | 0.72002 | 1.1528  | 0.98088 | 0.43241 | 1.2136 | 0.79992 | 0.8     | 0.73055 | 0.26054 | 0.99824 | 0.99835 | 0.99452 | 0.76254 | 2.5638 | 1.0597 | 0.04041 | 0.75151 | 3.8742 | 0.0041225 | 0.0041225 | 0.0041225 |
| 171 | 0.72385 | 1.1626  | 0.98892 | 0.43939 | 1.2205 | 0.79827 | 0.79835 | 0.72817 | 0.26004 | 0.99824 | 0.99835 | 0.99452 | 0.76311 | 2.5592 | 1.0586 | 0.04035 | 0.75201 | 3.875  | 0.0040716 | 0.0040716 | 0.0040716 |
| 172 | 0.72514 | 1.1684  | 0.9937  | 0.43797 | 1.2197 | 0.79827 | 0.79835 | 0.72817 | 0.26004 | 0.99824 | 0.99835 | 0.99452 | 0.76311 | 2.5592 | 1.0586 | 0.04035 | 0.75201 | 3.875  | 0.0040716 | 0.0040716 | 0.0040716 |
| 173 | 0.72514 | 1.1684  | 0.9937  | 0.43797 | 1.2197 | 0.79827 | 0.79835 | 0.72817 | 0.26004 | 0.99824 | 0.99835 | 0.99452 | 0.76311 | 2.5592 | 1.0586 | 0.04035 | 0.75201 | 3.875  | 0.0040716 | 0.0040716 | 0.0040716 |
| 174 | 0.71395 | 1.1295  | 0.9885  | 0.42355 | 1.2108 | 0.80222 | 0.80331 | 0.75229 | 0.25797 | 0.9999  | 1       | 0.995   | 0.76099 | 2.5626 | 1.0525 | 0.04036 | 0.74929 | 3.884  | 0.0039597 | 0.0039597 | 0.0039597 |
| 175 | 0.71885 | 1.1425  | 0.9905  | 0.42959 | 1.2141 | 0.80331 | 0.80331 | 0.75229 | 0.25797 | 0.9999  | 1       | 0.995   | 0.76099 | 2.5626 | 1.0525 | 0.04036 | 0.74929 | 3.884  | 0.0039597 | 0.0039597 | 0.0039597 |
| 176 | 0.71326 | 1.1295  | 0.9885  | 0.42574 | 1.2101 | 0.80331 | 0.80331 | 0.75229 | 0.25797 | 0.9999  | 1       | 0.995   | 0.76099 | 2.5626 | 1.0525 | 0.04036 | 0.74929 | 3.884  | 0.0039597 | 0.0039597 | 0.0039597 |
| 177 | 0.7164  | 1.1338  | 0.98555 | 0.42854 | 1.2112 | 0.79992 | 0.8     | 0.73055 | 0.26054 | 0.99824 | 0.99835 | 0.99452 | 0.76311 | 2.5592 | 1.0586 | 0.04035 | 0.75201 | 3.875  | 0.0040716 | 0.0040716 | 0.0040716 |
| 178 | 0.70903 | 1.0963  | 0.98463 | 0.42323 | 1.2095 | 0.79992 | 0.8     | 0.73055 | 0.26054 | 0.99824 | 0.99835 | 0.99452 | 0.76311 | 2.5592 | 1.0586 | 0.04035 | 0.75201 | 3.875  | 0.0040716 | 0.0040716 | 0.0040716 |
| 179 | 0.70428 | 1.1152  | 0.98616 | 0.43004 | 1.2126 | 0.79992 | 0.8     | 0.73055 | 0.26054 | 0.99824 | 0.99835 | 0.99452 | 0.76311 | 2.5592 | 1.0586 | 0.04035 | 0.75201 | 3.875  | 0.0040716 | 0.0040716 | 0.0040716 |
| 180 | 0.70209 | 1.0937  | 0.98028 | 0.41835 | 1.2033 | 0.79992 | 0.8     | 0.73055 | 0.26054 | 0.99824 | 0.99835 | 0.99452 | 0.76311 | 2.5592 | 1.0586 | 0.04035 | 0.75201 | 3.875  | 0.0040716 | 0.0040716 | 0.0040716 |
| 181 | 0.70502 | 1.0964  | 0.98463 | 0.42323 | 1.2095 | 0.79992 | 0.8     | 0.73055 | 0.26054 | 0.99824 | 0.99835 | 0.99452 | 0.76311 | 2.5592 | 1.0586 | 0.04035 | 0.75201 | 3.875  | 0.0040716 | 0.0040716 | 0.0040716 |
| 182 | 0.70408 | 1.0867  | 0.98427 | 0.41847 | 1.2033 | 0.79992 | 0.8     | 0.73055 | 0.26054 | 0.99824 | 0.99835 | 0.99452 | 0.76311 | 2.5592 | 1.0586 | 0.04035 | 0.75201 | 3.875  | 0.0040716 | 0.0040716 | 0.0040716 |
| 183 | 0.69496 | 1.0603  | 0.98175 | 0.41741 | 1.2001 | 0.80222 | 0.80331 | 0.75229 | 0.25797 | 0.9999  | 1       | 0.995   | 0.76099 | 2.5626 | 1.0525 | 0.04036 | 0.74929 | 3.884  | 0.0039597 | 0.0039597 | 0.0039597 |
| 184 | 0.69496 | 1.0603  | 0.98175 | 0.41741 | 1.2001 | 0.80222 | 0.80331 | 0.75229 | 0.25797 | 0.9999  | 1       | 0.995   | 0.76099 | 2.5626 | 1.0525 | 0.04036 | 0.74929 | 3.884  | 0.0039597 | 0.0039597 | 0.0039597 |
| 185 | 0.69539 | 1.0599  | 0.98095 | 0.41435 | 1.1996 | 0.80222 | 0.80331 | 0.75229 | 0.25797 | 0.9999  | 1       | 0.995   | 0.76099 | 2.5626 | 1.0525 | 0.04036 | 0.74929 | 3.884  | 0.0039597 | 0.0039597 | 0.0039597 |
| 186 | 0.69516 | 1.0547  | 0.97991 | 0.42099 | 1.2033 | 0.80222 | 0.80331 | 0.75229 | 0.25797 | 0.9999  | 1       | 0.995   | 0.76099 | 2.5626 | 1.0525 | 0.04036 | 0.74929 | 3.884  | 0.0039597 | 0.0039597 | 0.0039597 |
| 187 | 0.69678 | 1.027   | 0.97967 | 0.41892 | 1.2005 | 0.80331 | 0.80331 | 0.75229 | 0.25797 | 0.9999  | 1       | 0.995   | 0.76099 | 2.5626 | 1.0525 | 0.04036 | 0.74929 | 3.884  | 0.0039597 | 0.0039597 | 0.0039597 |
| 188 | 0.69157 | 1.0139  | 0.97997 | 0.41086 | 1.1844 | 0.80331 | 0.80331 | 0.75229 | 0.25797 | 0.9999  | 1       | 0.995   | 0.76099 | 2.5626 | 1.0525 | 0.04036 | 0.74929 | 3.884  | 0.0039597 | 0.0039597 | 0.0039597 |
| 189 | 0.69519 | 1.0294  | 0.98091 | 0.41621 | 1.1992 | 0.80331 | 0.80331 | 0.75229 | 0.25797 | 0.9999  | 1       | 0.995   | 0.76099 | 2.5626 | 1.0525 | 0.04036 | 0.74929 | 3.884  | 0.0039597 | 0.0039597 | 0.0039597 |
| 190 | 0.69536 | 1.0158  | 0.9812  | 0.41722 | 1.1945 | 0.80331 | 0.80331 | 0.75229 | 0.25797 | 0.9999  | 1       | 0.995   | 0.76099 | 2.5626 | 1.0525 | 0.04036 | 0.74929 | 3.884  | 0.0039597 | 0.0039597 | 0.0039597 |
| 191 | 0.69505 | 1.0091  | 0.97877 | 0.41584 | 1.1876 | 0.80331 | 0.80331 | 0.75229 | 0.25797 | 0.9999  | 1       | 0.995   | 0.76099 | 2.5626 | 1.0525 | 0.04036 | 0.74929 | 3.884  | 0.0039597 | 0.0039597 | 0.0039597 |
| 192 | 0.69892 | 1.0245  | 0.98492 | 0.41375 | 1.196  | 0.80222 | 0.80331 | 0.75229 | 0.25797 | 0.9999  | 1       | 0.995   | 0.76099 | 2.5626 | 1.0525 | 0.04036 | 0.74929 | 3.884  | 0.0039597 | 0.0039597 | 0.0039597 |
| 193 | 0.67951 | 0.98006 | 0.97033 | 0.40761 | 1.1877 | 0.80331 | 0.80331 | 0.75229 | 0.25797 | 0.9999  | 1       | 0.995   | 0.76099 | 2.5626 | 1.0525 | 0.04036 | 0.74929 | 3.884  | 0.0039597 | 0.0039597 | 0.0039597 |
| 194 | 0.68156 | 0.99312 | 0.97754 | 0.40908 | 1.1894 | 0.80222 | 0.80331 | 0.75229 | 0.25797 | 0.9999  | 1       | 0.995   | 0.76099 | 2.5626 | 1.0525 | 0.04036 | 0.74929 | 3.884  | 0.0039597 | 0.0039597 | 0.0039597 |
| 195 | 0.68234 | 0.97652 | 0.98037 | 0.40632 | 1.1932 | 0.80331 | 0.80331 | 0.75229 | 0.25797 | 0.9999  | 1       | 0.995   | 0.76099 | 2.5626 | 1.0525 | 0.04036 | 0.74929 | 3.884  | 0.0039597 | 0.0039597 | 0.0039597 |
| 196 | 0.67992 | 0.9604  | 0.97983 | 0.41197 | 1.1918 | 0.79992 | 0.8     | 0.73055 | 0.26054 | 0.99824 | 0.99835 | 0.99452 | 0.76311 | 2.5592 | 1.0586 | 0.04035 | 0.75201 | 3.875  | 0.0040716 | 0.0040716 | 0.0040716 |
| 197 | 0.68078 | 0.99006 | 0.97963 | 0.40742 | 1.1912 | 0.79992 | 0.8     | 0.73055 | 0.26054 | 0.99824 | 0.99835 | 0.99452 | 0.76311 | 2.5592 | 1.0586 | 0.04035 | 0.75201 | 3.875  | 0.0040716 | 0.0040716 | 0.0040716 |
| 198 | 0.67453 | 0.9894  | 0.98035 | 0.40375 | 1.1853 | 0.79992 | 0.8     | 0.73055 | 0.26054 | 0.99824 | 0.99835 | 0.99452 | 0.76311 | 2.5592 | 1.0586 | 0.04035 | 0.75201 | 3.875  | 0.0040716 | 0.0040716 | 0.0040716 |
| 199 | 0.67139 | 0.99635 | 0.98068 | 0.40645 | 1.1901 | 0.79992 | 0.8     | 0.73055 | 0.26054 | 0.99824 | 0.99835 | 0.99452 | 0.76311 | 2.5592 | 1.0586 | 0.04035 | 0.75201 | 3.875  | 0.0040716 | 0.0040716 | 0.0040716 |
| 200 | 0.67266 | 0.98322 | 0.97788 | 0.40274 | 1.1848 | 0.79992 | 0.8     | 0.73055 | 0.26054 | 0.99824 | 0.99835 | 0.99452 | 0.76311 | 2.5592 | 1.0586 | 0.04035 | 0.75201 | 3.875  | 0.0040716 | 0.0040716 | 0.0040716 |
| 201 | 0.7145  | 0.9204  | 0.98424 | 0.40574 | 1.1923 | 0.79992 | 0.8     | 0.73055 | 0.26054 | 0.99824 | 0.99835 | 0.99452 | 0.76311 | 2.5592 | 1.0586 | 0.04035 | 0.75201 | 3.875  | 0.0040716 | 0.0040716 | 0.0040716 |
| 202 | 0.69684 | 0.97761 | 0.97613 | 0.39887 | 1.1804 | 0.79992 | 0.8     | 0.73055 | 0.26054 | 0.99824 | 0.99835 | 0.99452 | 0.76311 | 2.5592 | 1.0586 | 0.04035 | 0.75201 | 3.875  | 0.0040716 | 0.0040716 | 0.0040716 |
| 203 | 0.6964  | 0.98983 | 0.98055 | 0.40137 | 1.1811 | 0.79992 | 0.8     | 0.73055 | 0.26054 | 0.99824 | 0.99835 | 0.99452 | 0.76311 | 2.5592 | 1.0586 | 0.04035 | 0.75201 | 3.875  | 0.0040716 | 0.0040716 | 0.0040716 |
| 204 | 0.69496 | 0.98965 | 0.98977 | 0.39793 | 1.1877 | 0.79992 | 0.8     | 0.73055 | 0.26054 | 0.99824 | 0.99835 | 0.99452 | 0.76311 | 2.5592 | 1.0586 | 0.04035 | 0.75201 | 3.875  | 0.0040716 | 0.0040716 | 0.0040716 |
| 205 | 0.69463 | 0.9121  | 0.97959 | 0.3987  | 1.1791 | 0.79992 | 0.8     | 0.73055 | 0.26054 | 0.99824 | 0.99835 | 0.99452 | 0.76311 | 2.5592 | 1.0586 | 0.04035 | 0.75201 | 3.875  | 0.0040716 | 0.0040716 | 0.0040716 |
| 206 | 0.69252 | 0.98068 | 0.98977 | 0.39771 | 1.1811 | 0.79992 | 0.8     | 0.73055 | 0.26054 | 0.99824 | 0.99835 | 0.99452 | 0.76311 | 2.5592 | 1.0586 | 0.04035 | 0.75201 | 3.875  | 0.0040716 | 0.0040716 | 0.0040716 |
| 207 | 0.69297 | 0.9723  | 0.98458 | 0.39753 | 1.1803 | 0.79992 | 0.8     | 0.73055 | 0.26054 | 0.99824 | 0.99835 | 0.99452 | 0.76311 | 2.5592 | 1.0586 | 0.04035 | 0.75201 | 3.875  | 0.0040716 | 0.0040716 | 0.0040716 |
| 208 | 0.69568 | 0.98028 | 0.97451 | 0.39379 | 1.1735 | 0.79992 | 0.8     | 0.73055 | 0.26054 | 0.99824 | 0.99835 | 0.99452 | 0.76311 | 2.5592 | 1.0586 | 0.04035 | 0.75201 | 3.875  | 0.0040716 | 0.0040716 | 0.0040716 |
| 209 | 0.67185 | 0.98195 | 0.97388 | 0.40225 | 1.1833 | 0.79992 | 0.8     | 0.73055 | 0.26054 | 0.99824 | 0.99835 | 0.99452 | 0.76311 | 2.5592 | 1.0586 | 0.04035 | 0.75201 | 3.875  | 0.0040716 | 0.0040716 | 0.0040716 |
| 210 | 0.69131 | 0.98138 | 0.98022 | 0.39723 | 1.1773 | 0.79992 | 0.8     | 0.73055 | 0.26054 | 0.99824 | 0.99835 | 0.99452 | 0.76311 | 2.5592 | 1.0586 | 0.04035 | 0.75201 | 3.875  | 0.0040716 | 0.0040716 | 0.0040716 |
| 211 | 0.68477 | 0.98023 | 0.97328 | 0.39296 | 1.1705 | 0.79992 | 0.8     | 0.73055 | 0.26054 | 0.99824 | 0.99835 | 0.99452 | 0.76311 | 2.5592 | 1.0586 | 0.04035 | 0.75201 | 3.875  | 0.0040716 | 0.0040716 | 0.0040716 |
| 212 | 0.68024 | 0.98933 | 0.97332 | 0.39323 | 1.1738 | 0.79992 | 0.8     | 0.73055 | 0.26054 | 0.99824 | 0.99835 | 0.99452 | 0.76311 | 2.5592 | 1.0586 | 0.04035 | 0.75201 | 3.875  | 0.0040716 | 0.0040716 | 0.0040716 |
| 213 | 0.6598  | 0.9742  | 0.98037 | 0.3917  | 1.1694 | 0.79992 | 0.8     | 0.73055 | 0.26054 | 0.99824 | 0.99835 | 0.99452 | 0.76311 | 2.5592 | 1.0586 | 0.04035 | 0.75201 | 3.875  | 0.0040716 | 0.0040716 | 0.0040716 |
| 214 | 0.69709 | 0.98742 | 0.97128 | 0.39307 | 1.1724 | 0.79992 | 0.8     | 0.73055 | 0.26054 | 0.99824 | 0.99835 | 0.99452 | 0.76311 | 2.5592 | 1.0586 | 0.04035 | 0.75201 | 3.875  | 0.0040716 | 0.0040716 | 0.0040716 |
| 215 | 0.69409 | 0.98731 | 0.97135 | 0.39389 | 1.1687 | 0.79992 | 0.8     | 0.73055 | 0.26054 | 0.99824 | 0.99835 | 0.99452 | 0.76311 | 2.5592 | 1.0586 | 0.04035 | 0.75201 | 3.875  | 0.0040716 | 0.0040716 | 0.0040716 |
| 216 | 0.69446 | 0.98719 | 0.98037 | 0.39484 | 1.1694 | 0.79992 | 0.8     | 0.73055 | 0.26054 | 0.99824 | 0.99835 | 0.99452 | 0.76311 | 2.5592 | 1.0586 | 0.04035 | 0.75201 | 3.875  | 0.0040716 | 0.0040716 | 0.0040716 |
| 217 | 0.69015 | 0.98473 | 0.97355 | 0.38806 | 1.1681 | 0.79992 | 0.8     | 0.73055 | 0.26054 | 0.99824 | 0.99835 | 0.99452 |         |        |        |         |         |        |           |           |           |
